# Supplementary material for: Emergence of an Extensively Drug-Resistant Salmonella enterica Serovar Typhi Clone Harboring a Promiscuous Plasmid Encoding Resistance to Fluoroquinolones and Third-Generation Cephalosporins
Source: PubMed Central journal article supplement (PMC5821095; doi:10.1128/mbio.00105-18), 2018-02-20

a.

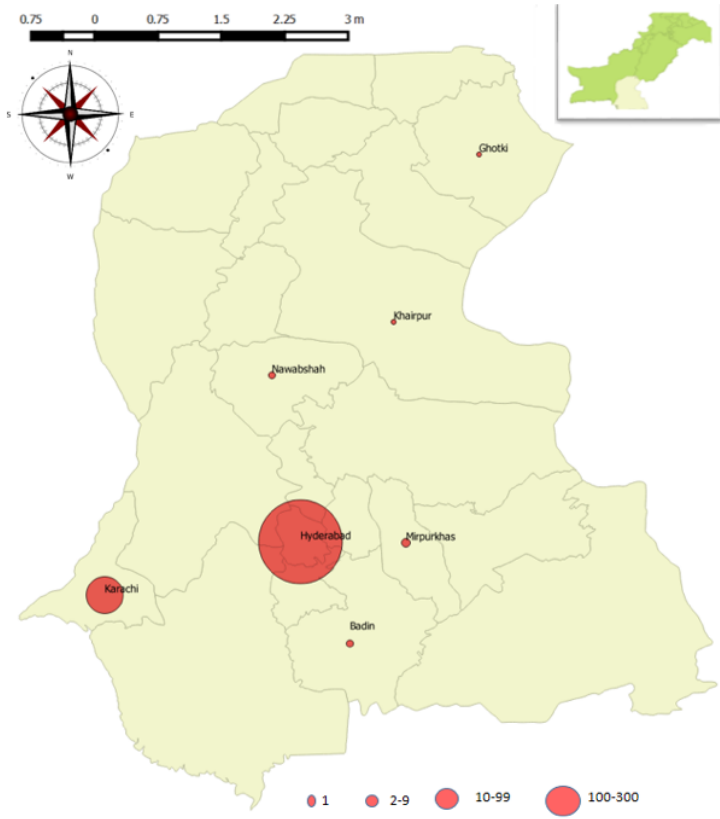

b.

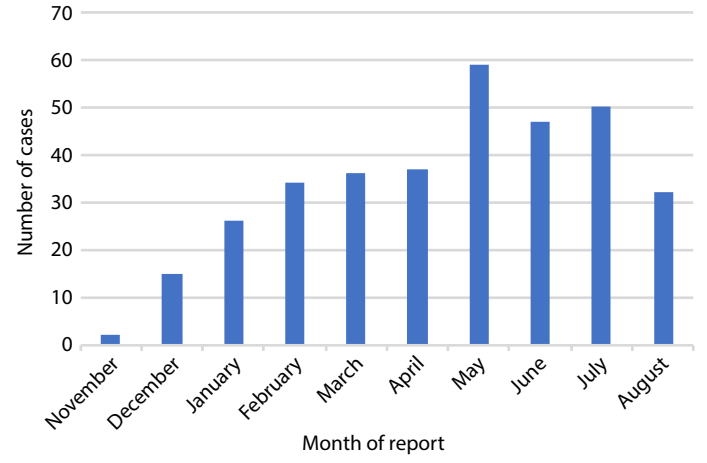

c.

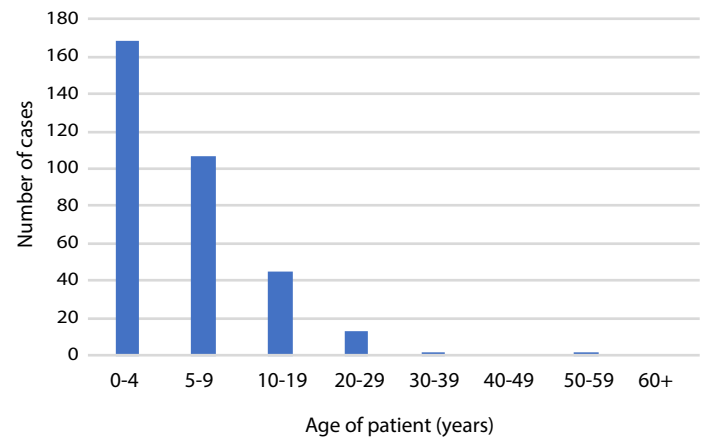

Supplement: mbo001183737sf1.pdf [file mbo001183737sf1.pdf]
