# Supplementary material for: Emergence of an Extensively Drug-Resistant Salmonella enterica Serovar Typhi Clone Harboring a Promiscuous Plasmid Encoding Resistance to Fluoroquinolones and Third-Generation Cephalosporins
Source: PubMed Central journal article supplement (PMC5821095; doi:10.1128/mbio.00105-18), 2018-02-20

**Country**

- Pakistan
- Bangladesh
- India
- Sri Lanka
- Iraq
- Afghanistan
- Lebanon
- Palestine
- Laos
- Thailand
- Vietnam
- Cambodia
- Indonesia
- Myanmar
- Nepal
- Kenya
- Tanzania
- Malawi
- S.Africa
- Fiji
- UK

**Sample Collection**

- XDR from Sindh, Pakistan
- Contextual from Sindh, Pakistan
- Global collection
- XDR from UK (traveller from Pakistan)

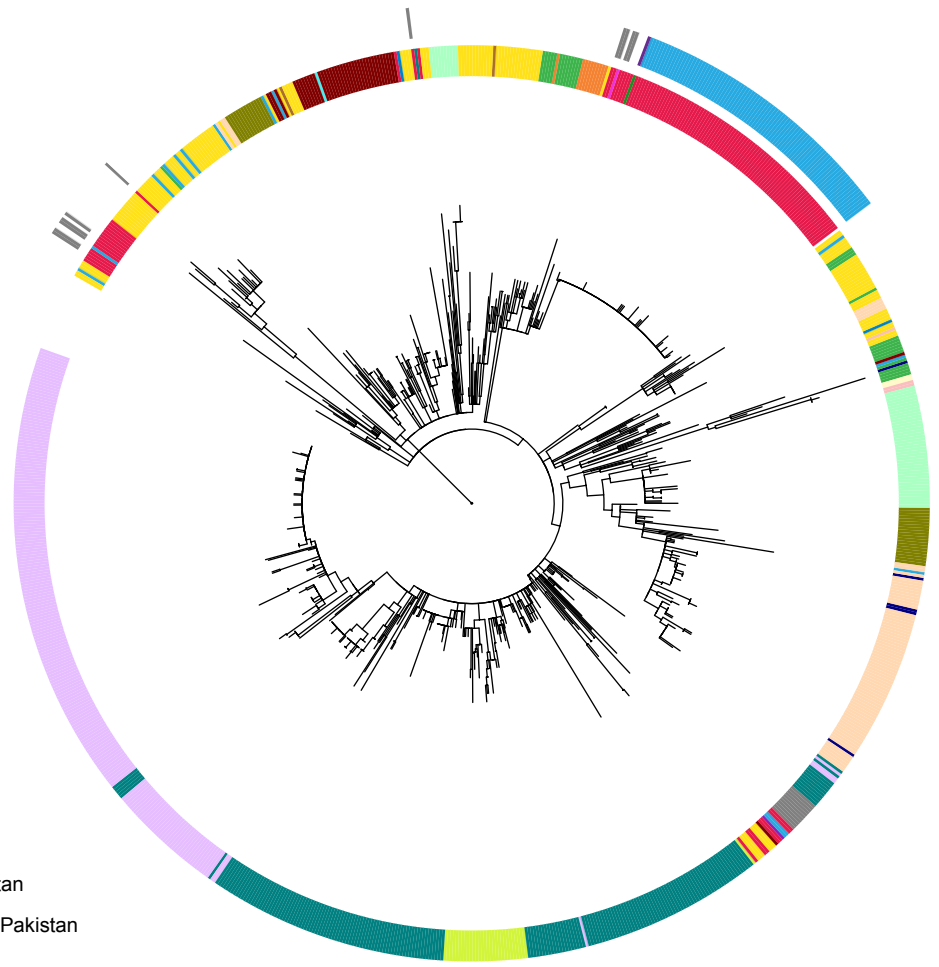

Supplement: mbo001183737sf2.pdf [file mbo001183737sf2.pdf]
